# Supplementary material for: Combined test of third lumbar skeletal muscle index and prognostic nutrition index improve prognosis prediction power in resected colorectal cancer liver metastasis
Source: publisher site journal article supplement (doi:10.18632/aging.102457), 2019-11-22
Supplement: Supplementary file [file aging-v11i22-102457-supplementary-material-SD1.pdf]

**SUPPLEMENTARY FIGURES**

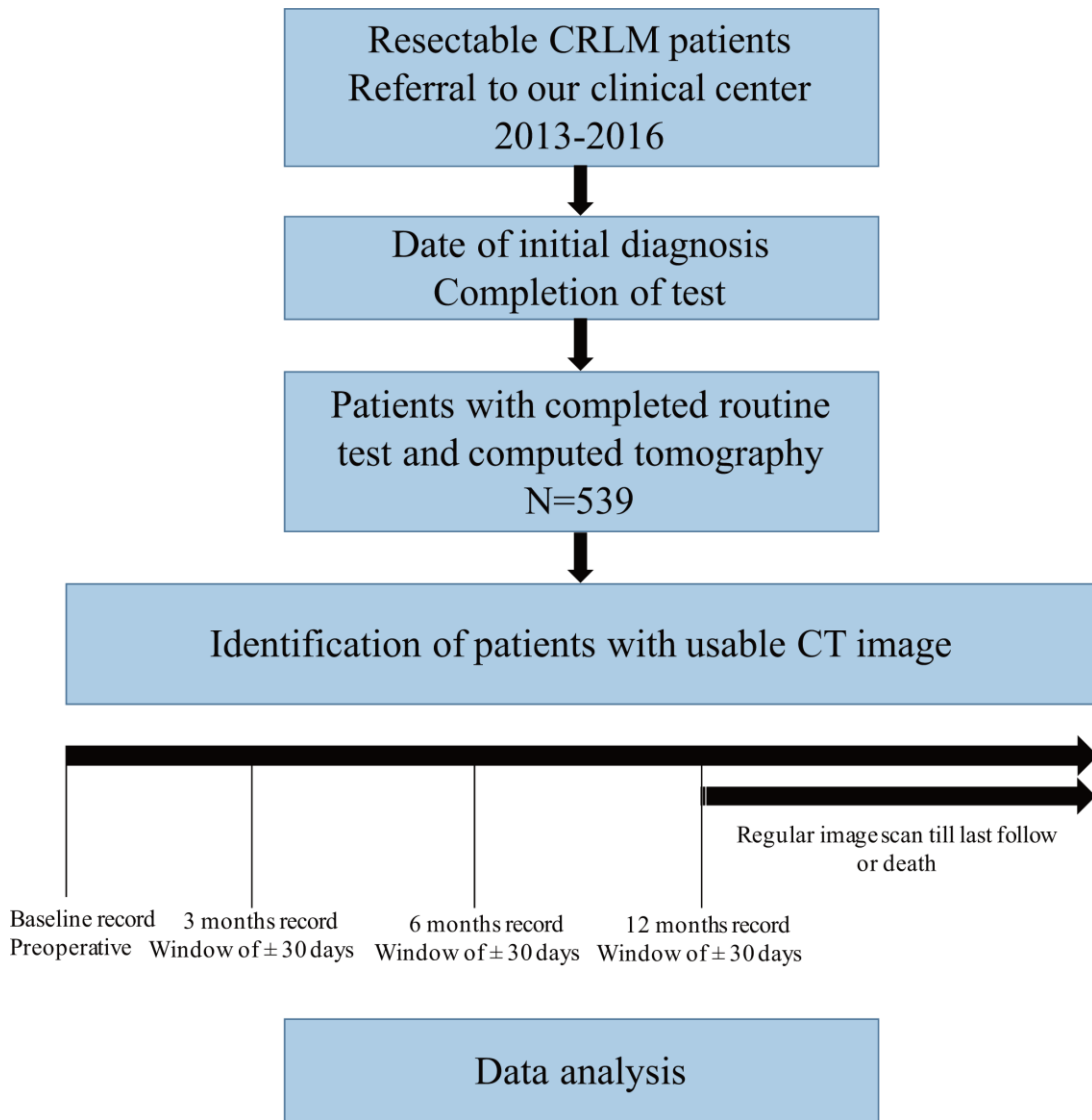

**Supplementary Figure 1. Flow diagram of resected colorectal cancer liver metastasis patients enrolled from our institution.**

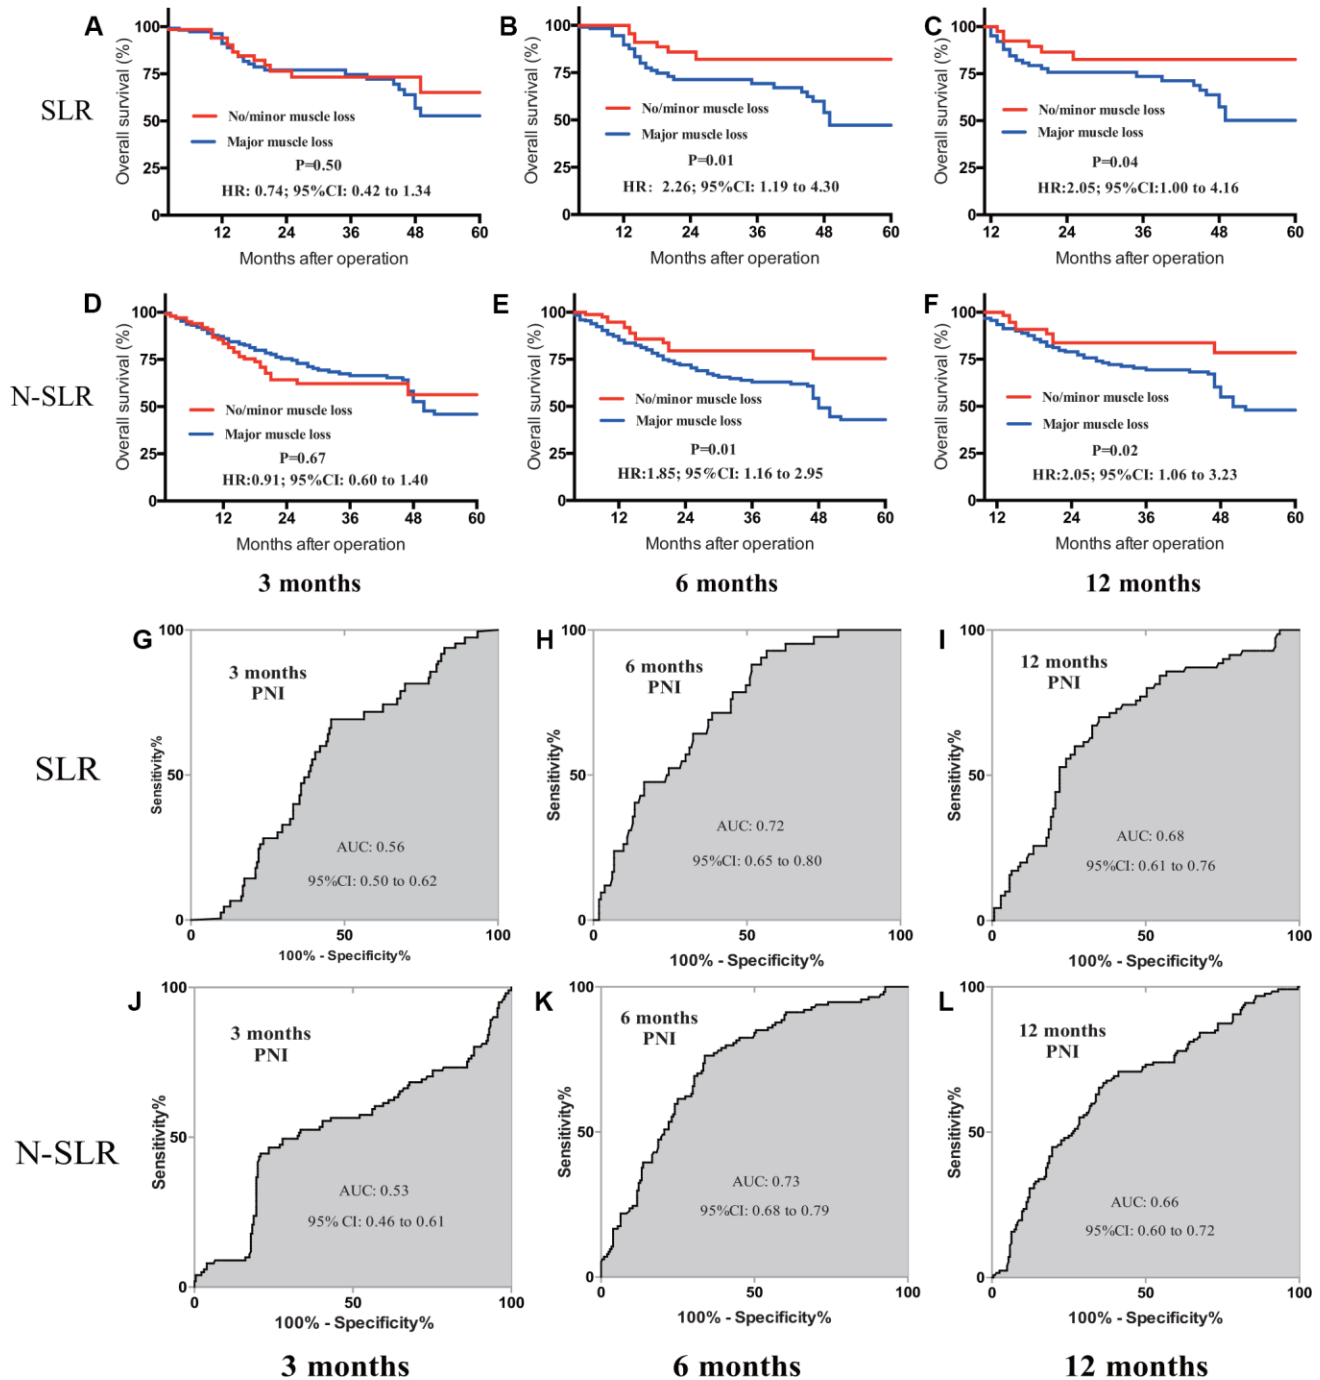

Supplementary Figure 2. Subgroup prognostic analysis of SMI and PNI in CRLM patients.
